# Supplementary material for: Dietary Nutrients Involved in One-Carbon Metabolism and Colonic Mucosa-Associated Gut Microbiome in Individuals with an Endoscopically Normal Colon
Source: PubMed Central journal article supplement (PMC6470629; doi:10.3390/nu11030613), 2019-03-13
Supplement: nutrients-11-00613-s001.pdf [file nutrients-11-00613-s001.pdf]

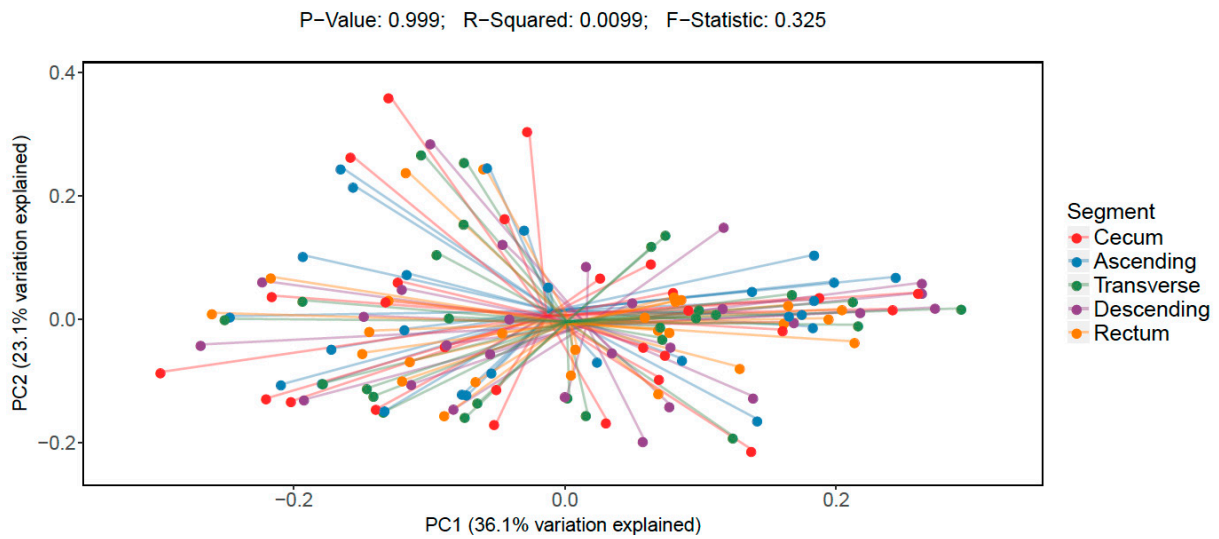

**Supplemental figure S1. Beta-diversities of the mucosa-associated gut bacterial communities.**

**Supplemental table S1.** Mean relative abundance (%) and its 95% confidence interval of major phylum by dietary consumption of nutrients (high or low) of one-carbon metabolism<sup>1</sup>.

| Nutrient      | Phylum          | Mean relative abundance (%) [95% confidence interval] |                      | FDR <i>P</i> -value |
|---------------|-----------------|-------------------------------------------------------|----------------------|---------------------|
|               |                 | High intake                                           | Low intake           |                     |
| Total choline | Firmicutes      | 44.26 [41.00, 47.53]                                  | 50.59 [46.42, 54.76] | <b>0.049</b>        |
|               | Bacteroidetes   | 35.84 [31.37, 40.30]                                  | 37.86 [33.83, 41.9]  | 0.641               |
|               | Proteobacteria  | 13.16 [10.72, 15.59]                                  | 6.95 [4.90, 8.99]    | <b>&lt;0.001</b>    |
|               | Verrucomicrobia | 4.58 [2.31, 6.86]                                     | 1.67 [0.07, 3.28]    | 0.091               |
|               | Fusobacteria    | 1.42 [0.43, 2.41]                                     | 2.37 [0.54, 4.21]    | 0.372               |
|               | Actinobacteria  | 0.57 [0.23, 0.90]                                     | 0.47 [0.35, 0.60]    | <b>0.028</b>        |
| Betaine       | Firmicutes      | 44.56 [40.60, 48.52]                                  | 50.69 [46.99, 54.39] | 0.194               |
|               | Bacteroidetes   | 37.80 [33.13, 42.46]                                  | 36.07 [32.29, 39.84] | 0.908               |
|               | Proteobacteria  | 10.98 [8.16, 13.81]                                   | 8.69 [6.85, 10.54]   | 0.501               |
|               | Verrucomicrobia | 3.29 [1.33, 5.24]                                     | 2.77 [0.79, 4.74]    | 0.464               |
|               | Fusobacteria    | 2.66 [0.67, 4.64]                                     | 1.22 [0.31, 2.13]    | 0.501               |
|               | Actinobacteria  | 0.63 [0.32, 0.94]                                     | 0.41 [0.28, 0.54]    | 0.784               |
| Methionine    | Firmicutes      | 44.48 [40.85, 48.12]                                  | 51.48 [47.49, 55.46] | <b>0.012</b>        |
|               | Bacteroidetes   | 39.10 [34.89, 43.31]                                  | 34.30 [30.19, 38.40] | 0.234               |
|               | Proteobacteria  | 11.11 [8.97, 13.25]                                   | 8.28 [5.64, 10.92]   | <b>0.012</b>        |
|               | Verrucomicrobia | 3.93 [1.90, 5.96]                                     | 1.93 [0.14, 3.73]    | 0.587               |
|               | Fusobacteria    | 0.66 [0.13, 1.18]                                     | 3.47 [1.22, 5.71]    | 0.870               |
|               | Actinobacteria  | 0.60 [0.31, 0.89]                                     | 0.42 [0.30, 0.54]    | 0.268               |
| Folate        | Firmicutes      | 47.71 [44.46, 50.96]                                  | 47.58 [42.67, 52.49] | 0.856               |

|             |                 |                      |                      |                  |
|-------------|-----------------|----------------------|----------------------|------------------|
|             | Bacteroidetes   | 36.12 [32.18, 40.06] | 38.07 [33.46, 42.67] | 0.730            |
|             | Proteobacteria  | 10.12 [7.88, 12.35]  | 9.42 [6.82, 12.01]   | 0.730            |
|             | Verrucomicrobia | 4.31 [2.45, 6.18]    | 1.18 [-0.75, 3.11]   | <b>&lt;0.001</b> |
|             | Fusobacteria    | 0.91 [0.25, 1.56]    | 3.39 [0.97, 5.81]    | 0.856            |
|             | Actinobacteria  | 0.67 [0.40, 0.94]    | 0.31 [0.21, 0.40]    | 0.554            |
| Vitamin B2  | Firmicutes      | 47.15 [43.71, 50.59] | 48.26 [43.75, 52.78] | 0.862            |
|             | Bacteroidetes   | 37.74 [33.97, 41.51] | 35.94 [31.15, 40.73] | 0.862            |
|             | Proteobacteria  | 9.2 [7.05, 11.35]    | 10.58 [7.89, 13.27]  | 0.862            |
|             | Verrucomicrobia | 4.68 [2.70, 6.65]    | 1.03 [-0.72, 2.78]   | <b>&lt;0.001</b> |
|             | Fusobacteria    | 0.38 [0.19, 0.56]    | 3.8 [1.53, 6.08]     | 0.862            |
|             | Actinobacteria  | 0.68 [0.39, 0.97]    | 0.33 [0.24, 0.42]    | 0.862            |
| Vitamin B6  | Firmicutes      | 49.8 [46.21, 53.39]  | 44.33 [40.18, 48.48] | 0.091            |
|             | Bacteroidetes   | 36.27 [32.61, 39.94] | 37.93 [32.81, 43.05] | 0.428            |
|             | Proteobacteria  | 8.86 [6.85, 10.87]   | 11.33 [8.39, 14.27]  | 0.215            |
|             | Verrucomicrobia | 3.88 [2.11, 5.64]    | 1.70 [-0.5, 3.90]    | <b>0.010</b>     |
|             | Fusobacteria    | 0.37 [0.20, 0.54]    | 4.35 [1.74, 6.96]    | 0.428            |
|             | Actinobacteria  | 0.69 [0.43, 0.95]    | 0.26 [0.17, 0.34]    | 0.066            |
| Vitamin B12 | Firmicutes      | 48.08 [44.97, 51.2]  | 47.2 [42.52, 51.88]  | 0.814            |
|             | Bacteroidetes   | 35.01 [32.17, 37.85] | 38.96 [33.61, 44.30] | 0.424            |
|             | Proteobacteria  | 10.32 [7.98, 12.65]  | 9.31 [6.84, 11.77]   | 0.424            |
|             | Verrucomicrobia | 5.05 [2.99, 7.11]    | 0.87 [-0.76, 2.50]   | <b>&lt;0.001</b> |
|             | Fusobacteria    | 0.69 [0.13, 1.25]    | 3.25 [1.14, 5.36]    | 0.814            |
|             | Actinobacteria  | 0.64 [0.34, 0.94]    | 0.39 [0.27, 0.51]    | 0.814            |

1. The median of the nutrient intake was used to dichotomize low versus high nutrient intake.

**Supplemental table S2.** Mean relative abundance (%) and its 95% confidence interval of selected bacterial genus by dietary consumption of methyl donor of one-carbon metabolism<sup>1</sup>.

| Nutrient      | Genus                         | Mean relative abundance (%) [95% confidence interval] |                      | FDR P-value  |
|---------------|-------------------------------|-------------------------------------------------------|----------------------|--------------|
|               |                               | High intake                                           | Low intake           |              |
| Total choline | <i>Bacteroides</i>            | 27.95 [22.54, 33.35]                                  | 30.71 [26.65, 34.76] | 0.515        |
|               | <i>Faecalibacterium</i>       | 8.42 [5.99, 10.84]                                    | 9.27 [6.91, 11.62]   | 0.718        |
|               | <i>Escherichia/Shigella</i>   | 7.18 [4.59, 9.78]                                     | 3.09 [1.27, 4.91]    | 0.055        |
|               | <i>Akkermansia</i>            | 4.58 [2.30, 6.86]                                     | 1.67 [0.07, 3.28]    | 0.257        |
|               | <i>Roseburia</i>              | 3.29 [2.28, 4.29]                                     | 1.95 [1.31, 2.59]    | 0.257        |
|               | <i>Erysipelatoclostridium</i> | 1.06 [0.04, 2.09]                                     | 1.6 [0.58, 2.63]     | 0.874        |
|               | <i>Odoribacterium</i>         | 0.30 [0.18, 0.42]                                     | 0.50 [0.31, 0.69]    | 0.669        |
|               | <i>Dialister</i>              | 0.23 [0.10, 0.37]                                     | 0.13 [0.05, 0.21]    | 0.434        |
|               | <i>Bifidobacterium</i>        | 0.23 [0.04, 0.42]                                     | 0.11 [0.04, 0.18]    | 0.176        |
| Betaine       | <i>Bacteroides</i>            | 31.29 [26.59, 35.98]                                  | 27.60 [22.95, 32.26] | 0.427        |
|               | <i>Faecalibacterium</i>       | 7.48 [5.60, 9.36]                                     | 10.23 [7.48, 12.99]  | 0.457        |
|               | <i>Escherichia/Shigella</i>   | 6.05 [3.32, 8.78]                                     | 3.95 [2.30, 5.60]    | 0.427        |
|               | <i>Akkermansia</i>            | 3.28 [1.33, 5.24]                                     | 2.77 [0.79, 4.74]    | 0.370        |
|               | <i>Roseburia</i>              | 3.39 [2.39, 4.39]                                     | 1.76 [1.19, 2.33]    | 0.142        |
|               | <i>Erysipelatoclostridium</i> | 0.28 [0.03, 0.54]                                     | 2.4 [1.05, 3.75]     | <b>0.036</b> |
|               | <i>Odoribacterium</i>         | 0.51 [0.35, 0.68]                                     | 0.31 [0.15, 0.47]    | <b>0.036</b> |
|               | <i>Dialister</i>              | 0.21 [0.11, 0.31]                                     | 0.15 [0.03, 0.26]    | 0.341        |
|               | <i>Bifidobacterium</i>        | 0.24 [0.08, 0.40]                                     | 0.10 [-0.01, 0.20]   | 0.252        |
| Methionine    | <i>Bacteroides</i>            | 31.54 [26.73, 36.36]                                  | 26.88 [22.51, 31.24] | 0.432        |
|               | <i>Faecalibacterium</i>       | 8.01 [5.97, 10.05]                                    | 9.91 [7.12, 12.69]   | 0.699        |
|               | <i>Escherichia/Shigella</i>   | 5.61 [3.43, 7.79]                                     | 4.24 [1.89, 6.59]    | 0.432        |
|               | <i>Akkermansia</i>            | 3.92 [1.89, 5.96]                                     | 1.93 [0.14, 3.73]    | 0.699        |
|               | <i>Roseburia</i>              | 2.83 [1.93, 3.73]                                     | 2.25 [1.53, 2.97]    | 0.920        |
|               | <i>Erysipelatoclostridium</i> | 1.32 [0.33, 2.31]                                     | 1.39 [0.32, 2.46]    | 0.962        |
|               | <i>Odoribacterium</i>         | 0.28 [0.19, 0.38]                                     | 0.56 [0.33, 0.78]    | 0.699        |
|               | <i>Dialister</i>              | 0.14 [0.06, 0.21]                                     | 0.23 [0.09, 0.37]    | 0.920        |
|               | <i>Bifidobacterium</i>        | 0.26 [0.09, 0.42]                                     | 0.06 [0.01, 0.11]    | 0.432        |

1. The median of the nutrient intake was used to dichotomize low versus high nutrient intake.
